# Supplementary material for: The impact of taphonomic data on phylogenetic resolution: Helenodora inopinata (Carboniferous, Mazon Creek Lagerstätte) and the onychophoran stem lineage
Source: PubMed Central journal article supplement (PMC4722706; doi:10.1186/s12862-016-0582-7), 2016-01-22

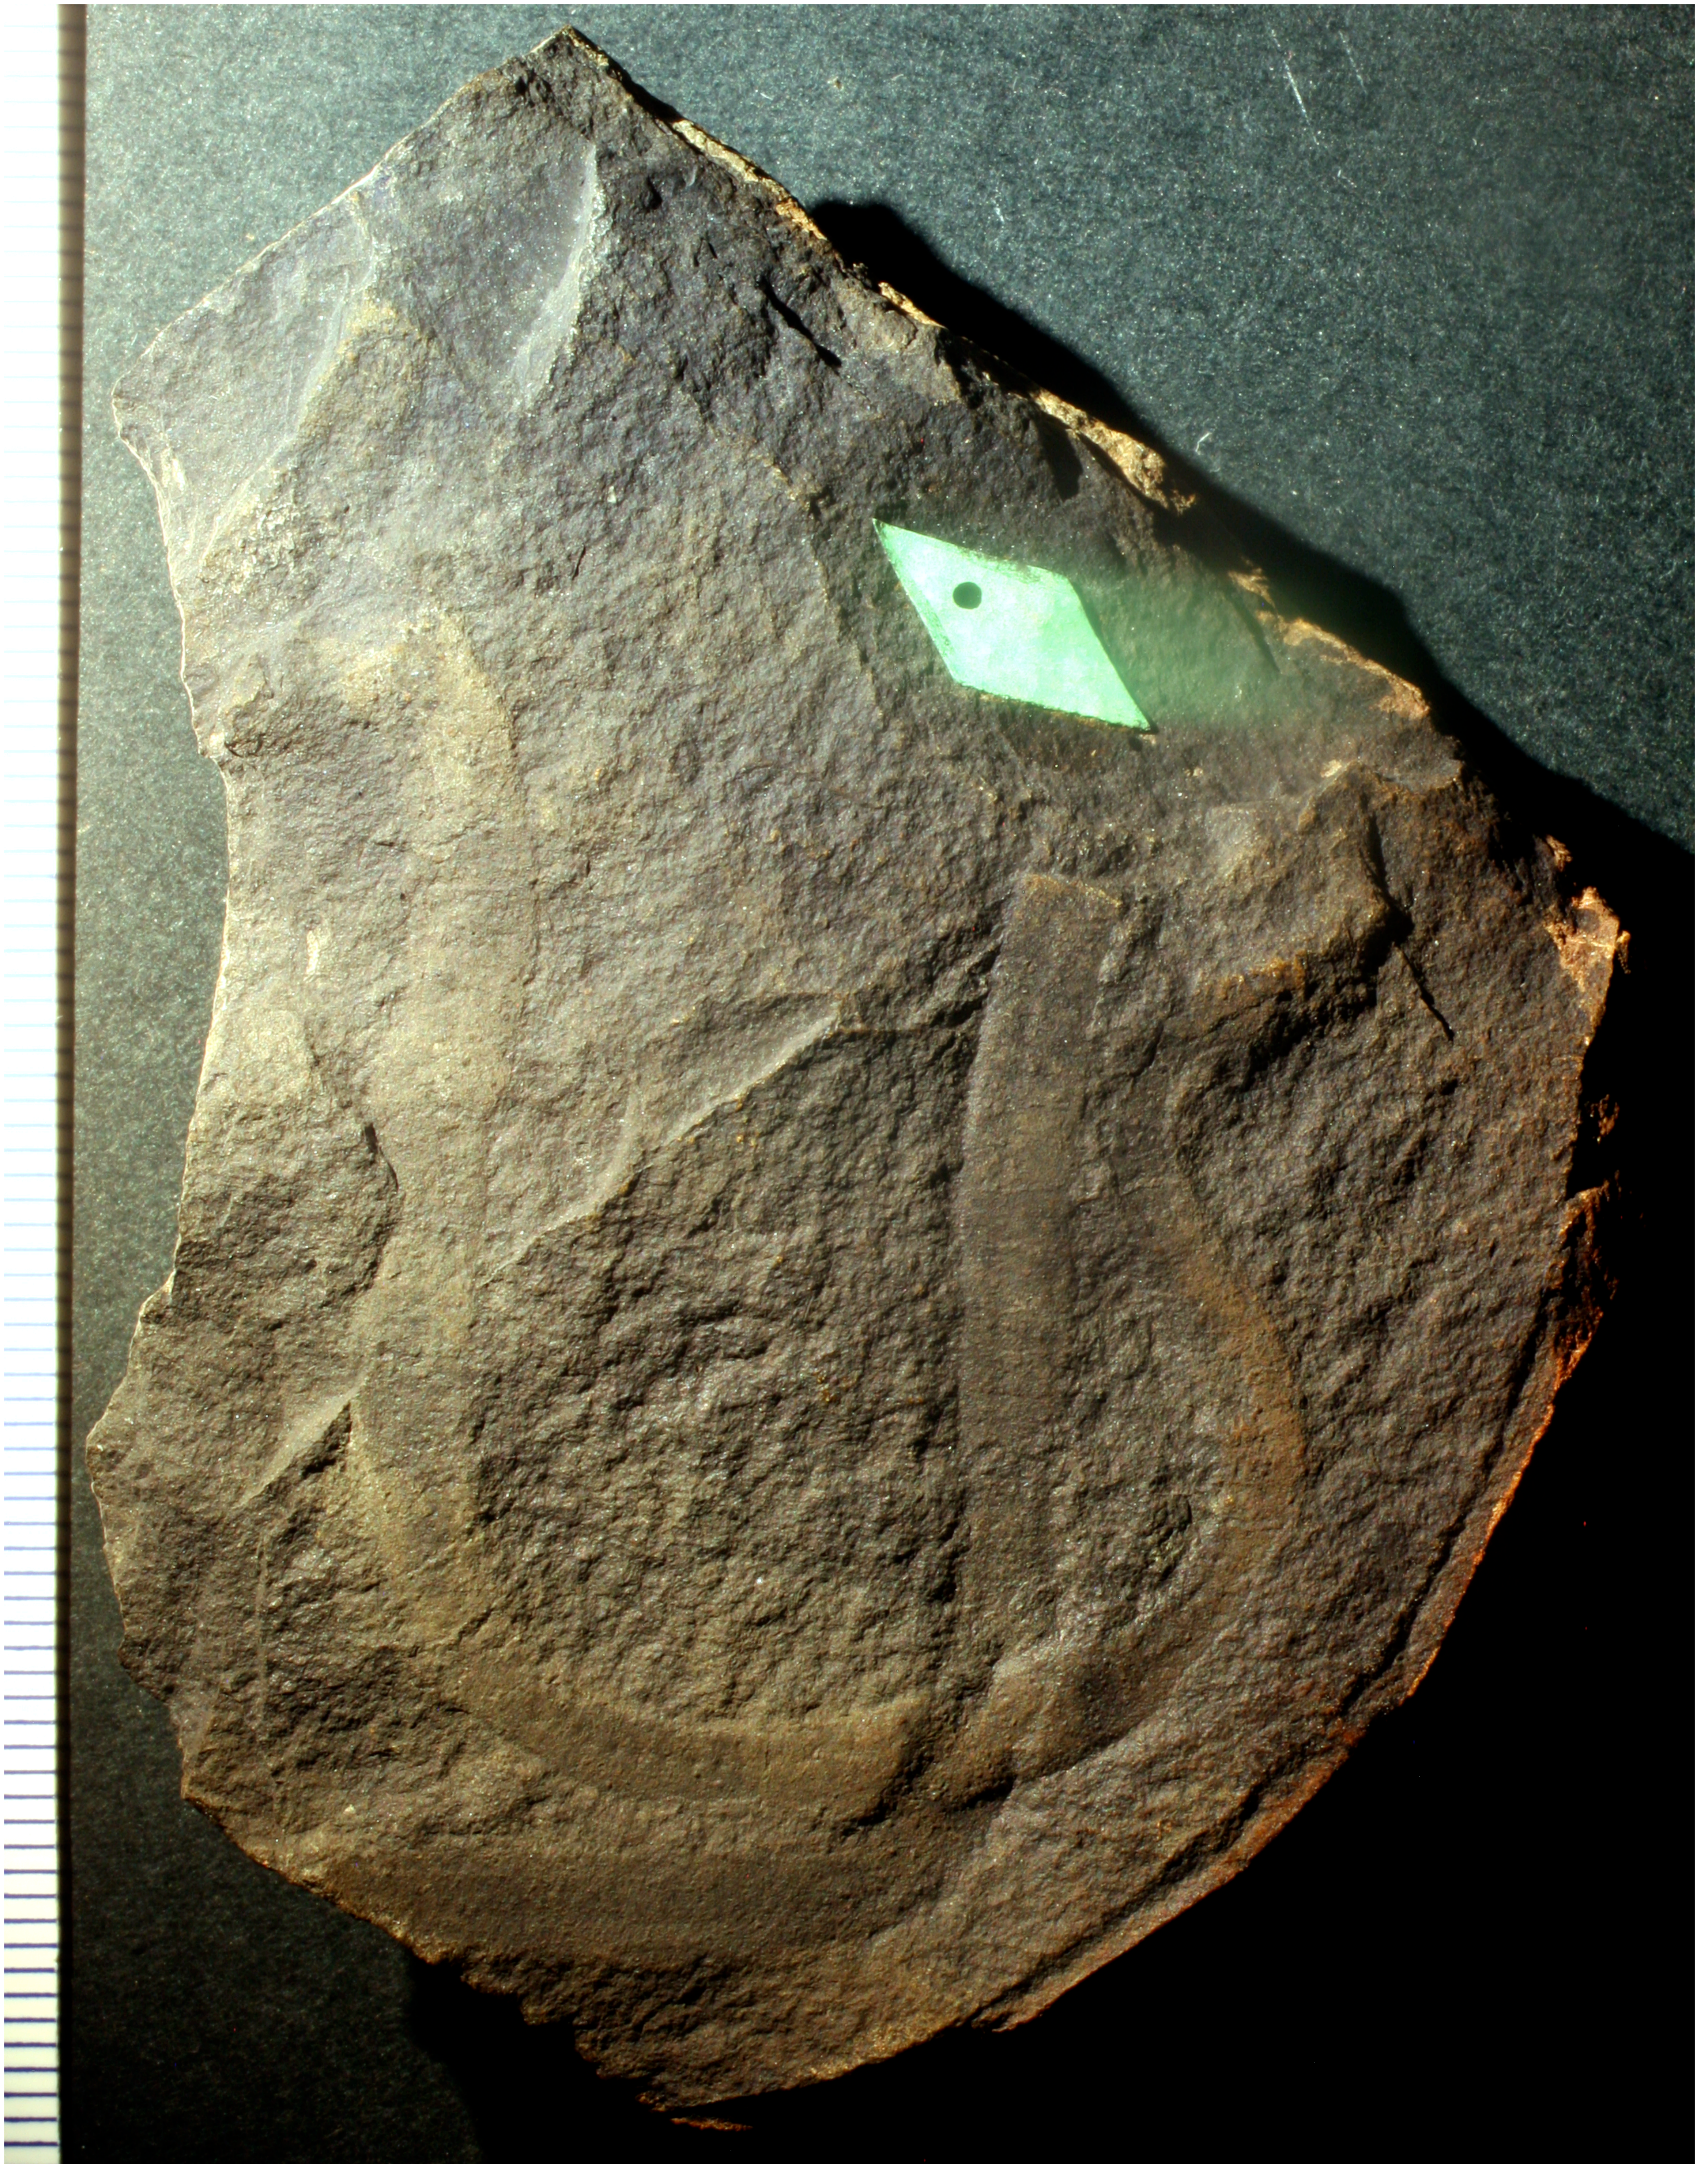

FIG 1A FULL

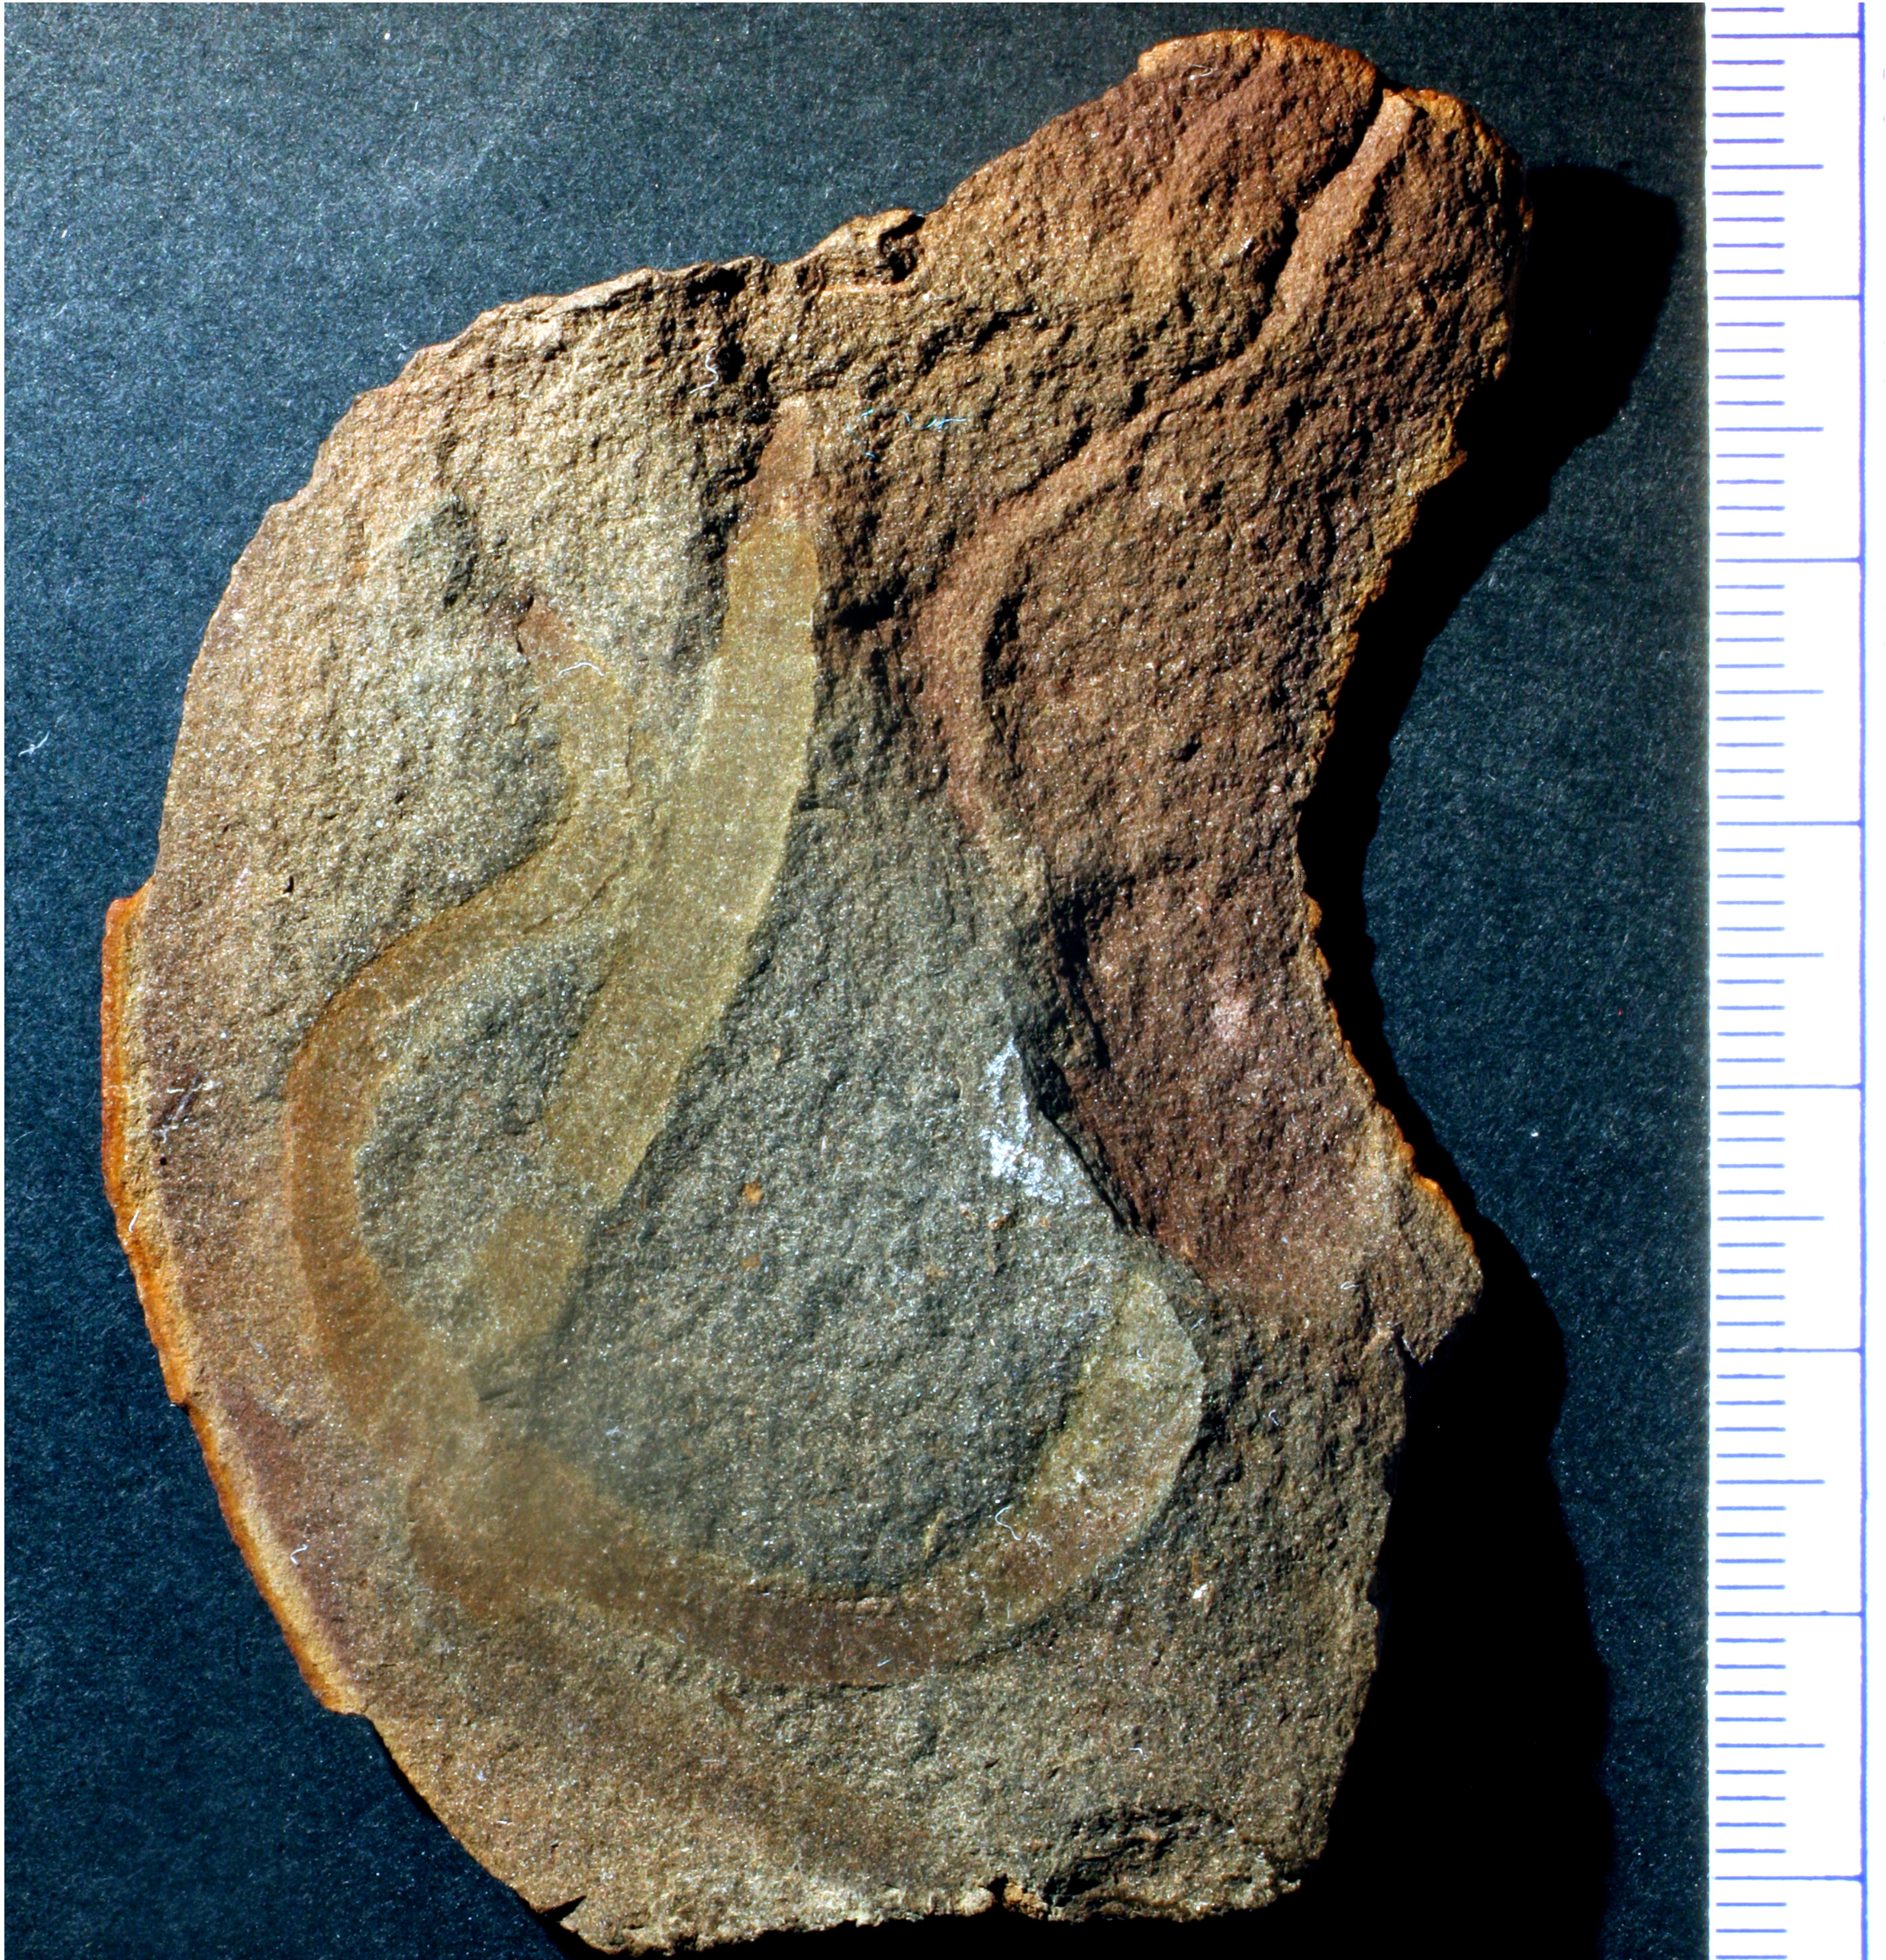

FIG 18 FULL

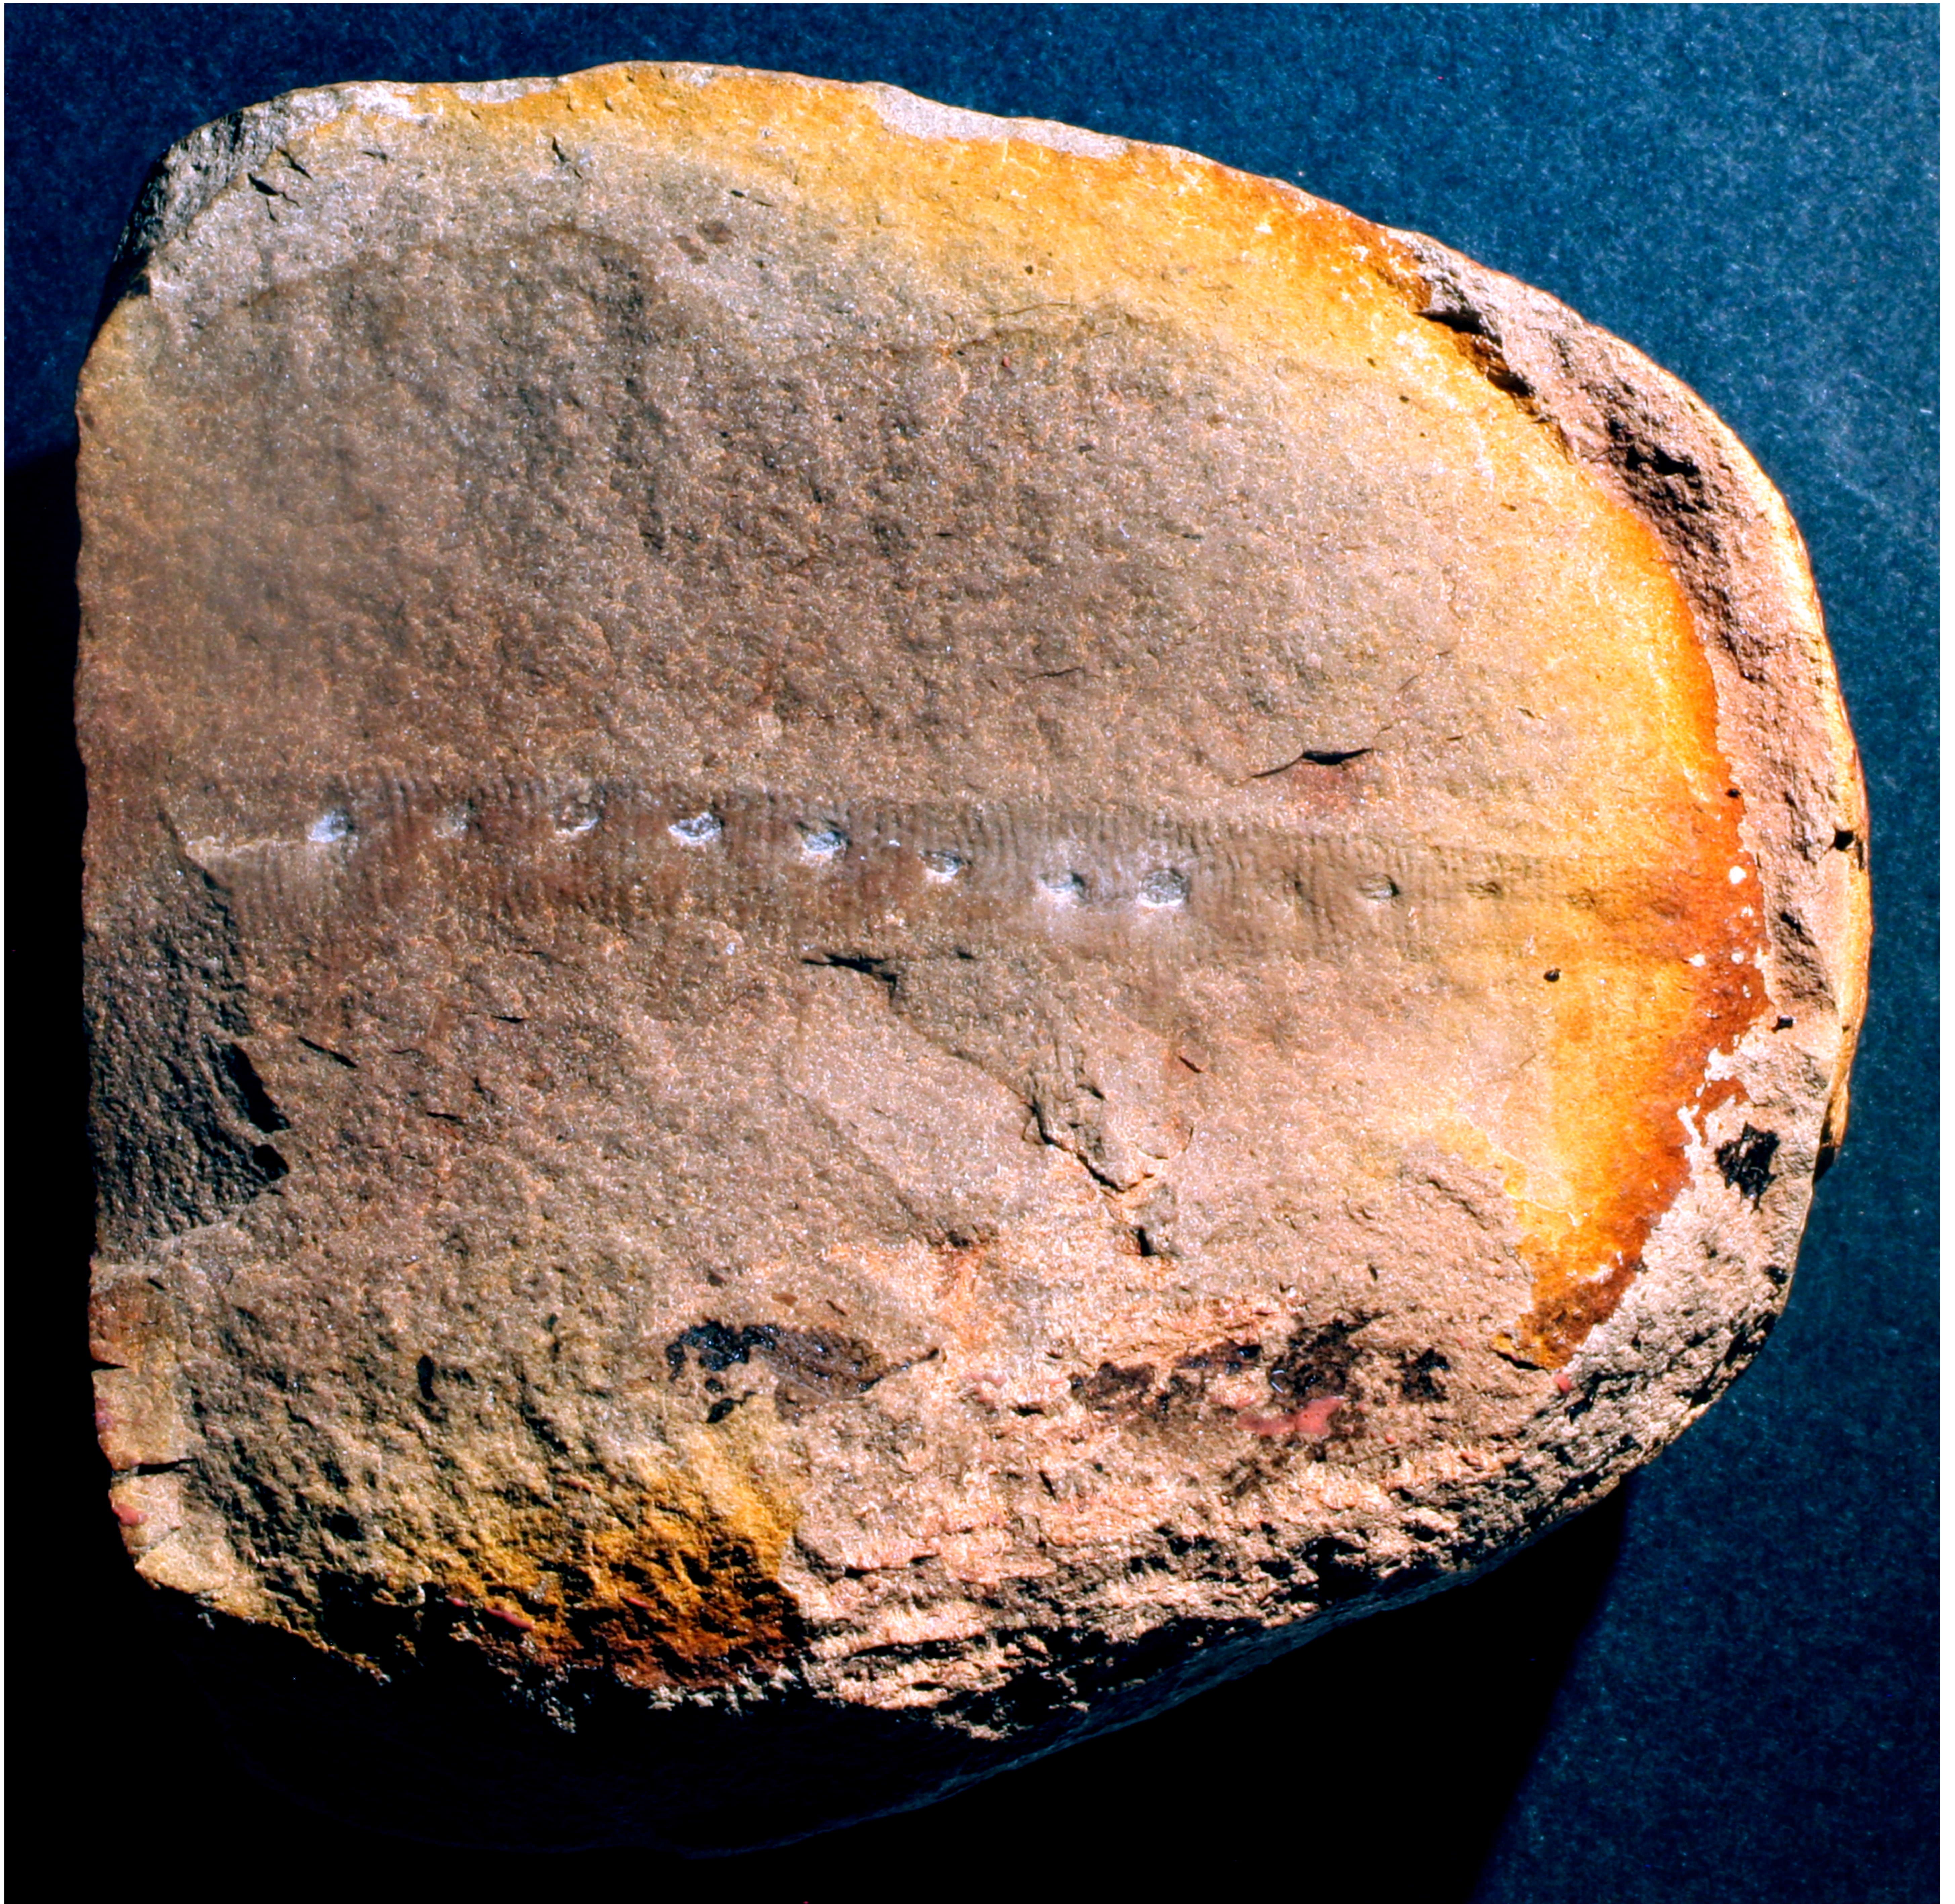

FIG 1C FULL

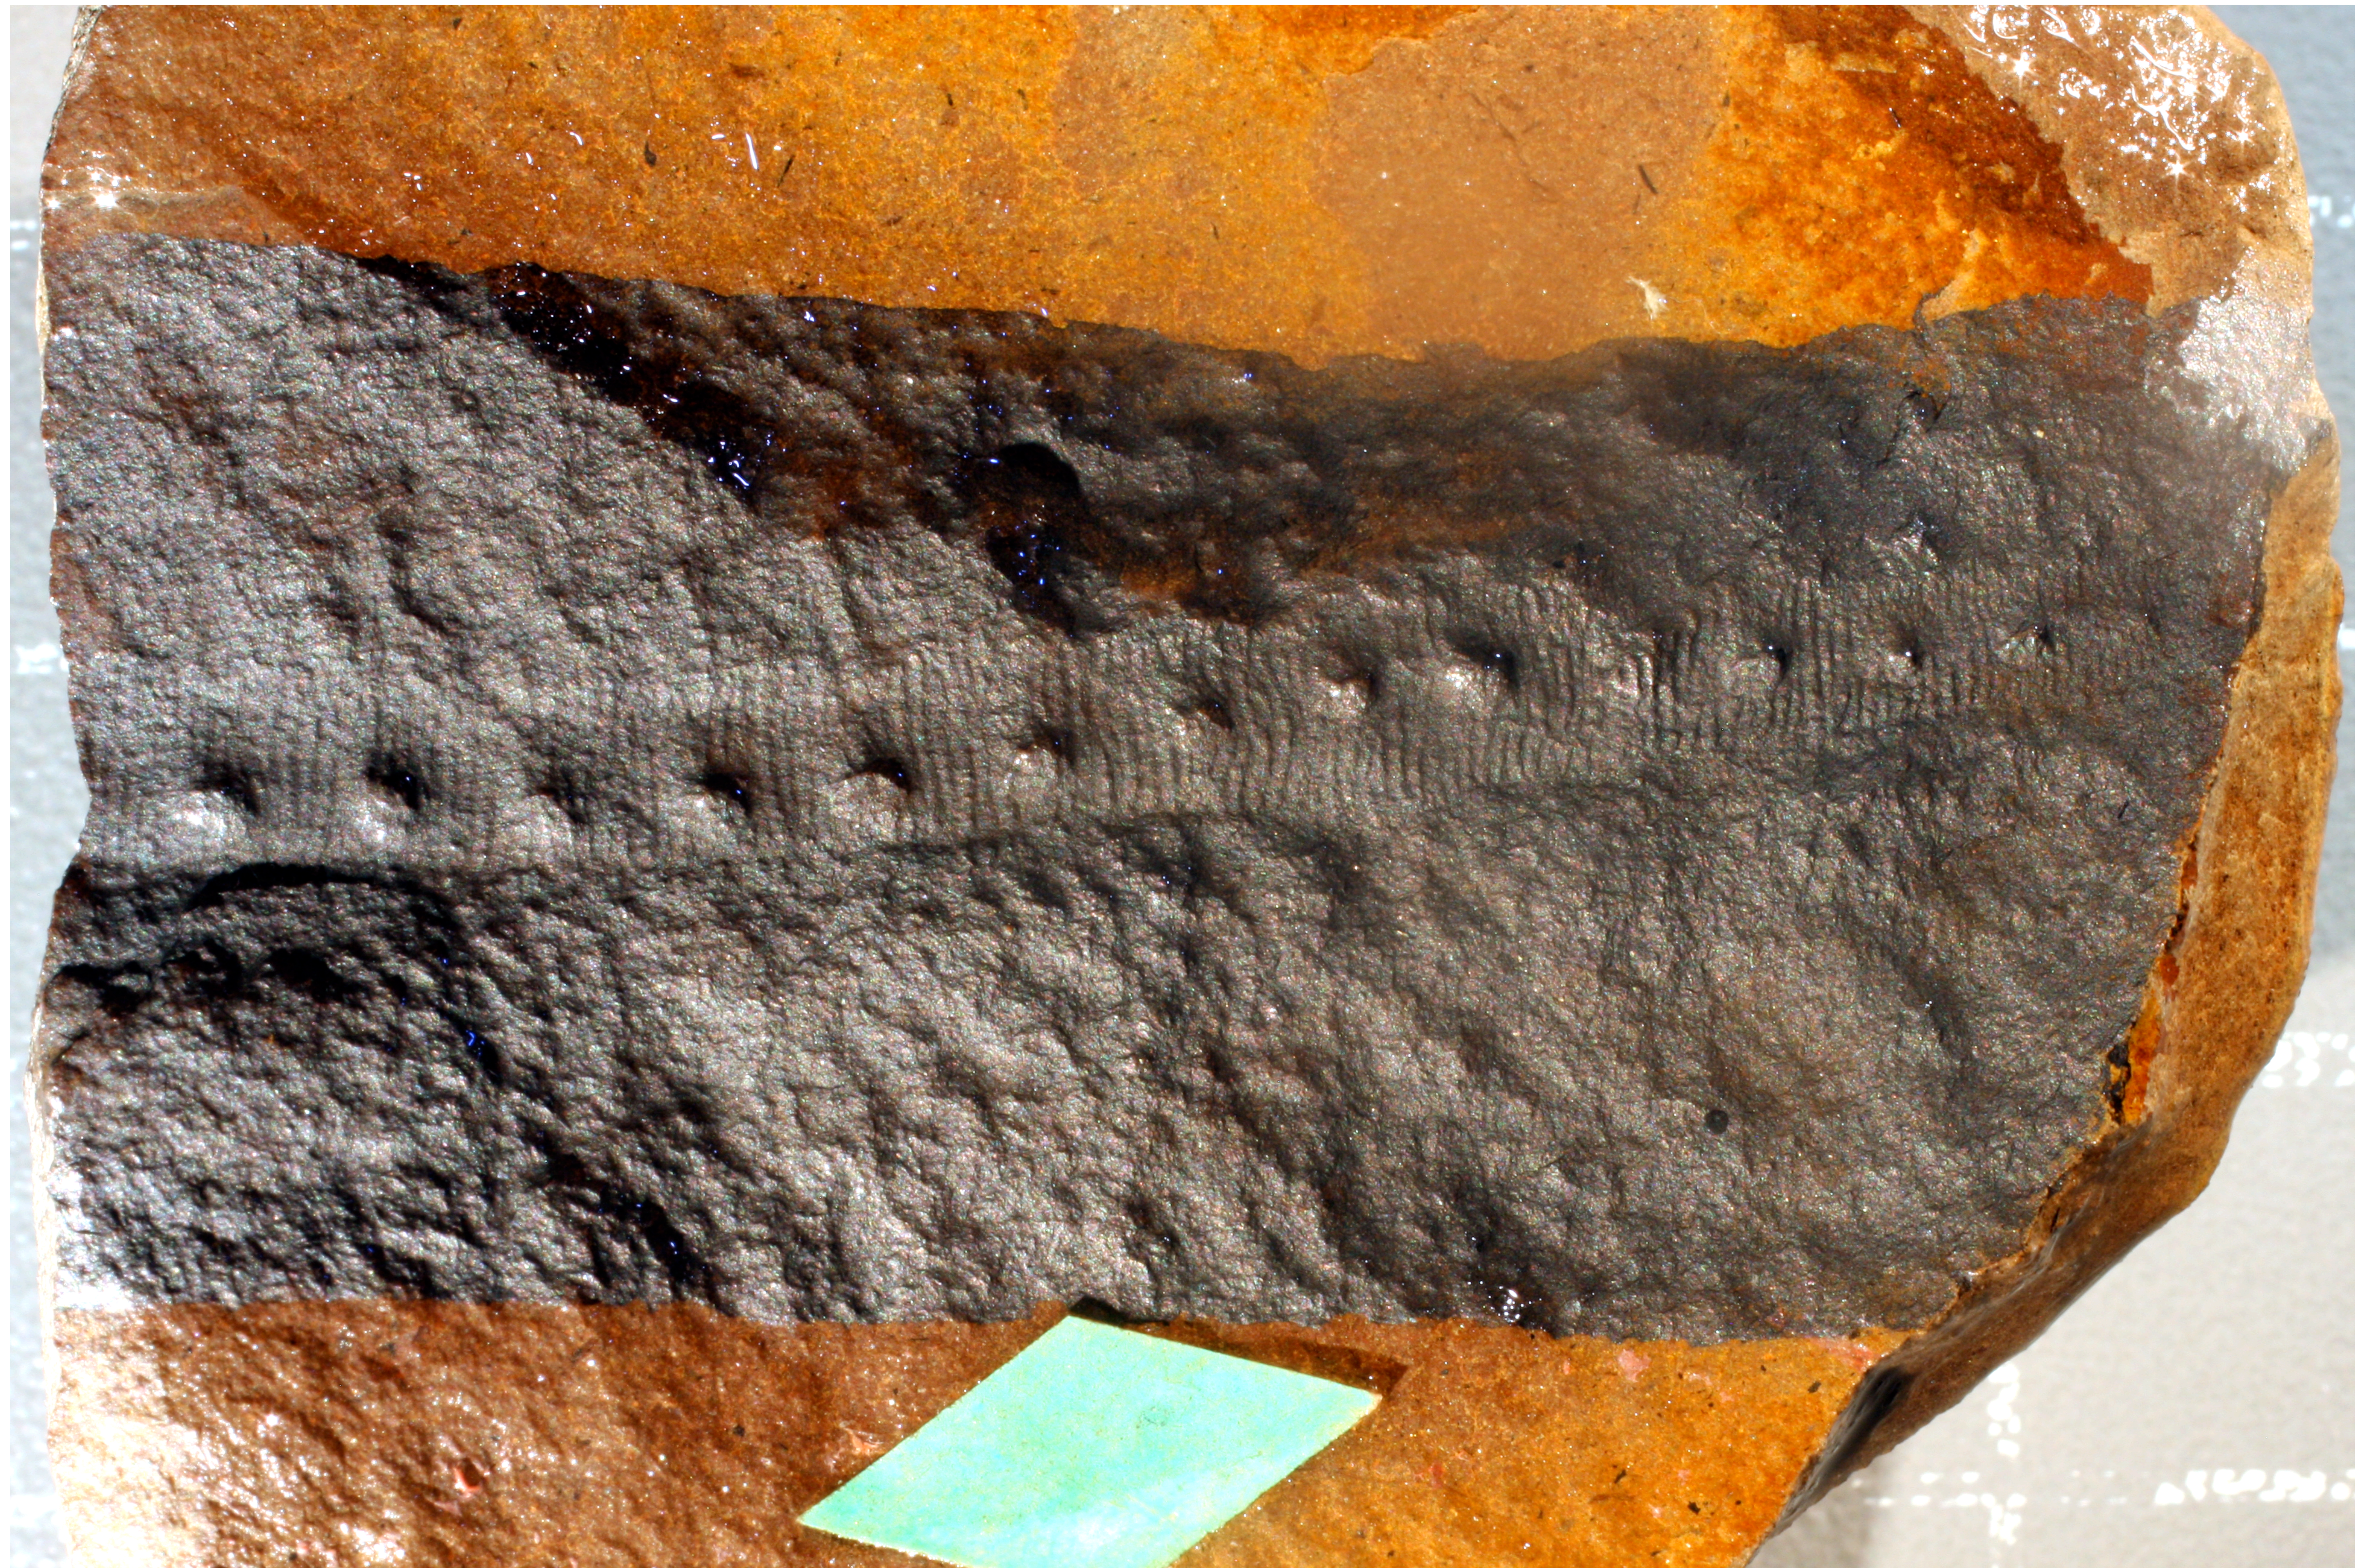

Supplement: 12862_2016_582_MOESM1_ESM.pdf [file 12862_2016_582_MOESM1_ESM.pdf]
