# Supplementary material for: The impact of taphonomic data on phylogenetic resolution: Helenodora inopinata (Carboniferous, Mazon Creek Lagerstätte) and the onychophoran stem lineage
Source: PubMed Central journal article supplement (PMC4722706; doi:10.1186/s12862-016-0582-7), 2016-01-22
Supplement: 12862_2016_582_MOESM7_ESM.pdf [file 12862_2016_582_MOESM7_ESM.pdf]

| Character from Yang et al. 2015                                                       | Original coding          | Our decay-informed coding                                              | Our conservative coding | Notes                                                                      |
|---------------------------------------------------------------------------------------|--------------------------|------------------------------------------------------------------------|-------------------------|----------------------------------------------------------------------------|
| 12. Nature of first post-ocular (deutocerebral) appendage                             | (?) ambiguous            | <b>(0) lobopodous ambulatory limb</b>                                  | (?) ambiguous           | Taphonomic analysis indicates lack of jaws is real, not result of decay    |
| 13. Inner blade of deutocerebral jaw with diastema                                    | (?) ambiguous            | <b>(-) inapplicable: deutocerebral jaw (Character 12) absent</b>       | (?) ambiguous           | Taphonomic analysis indicates lack of jaws is real, not result of decay    |
| 14. Deutocerebral limb pair structurally differentiated from rest of trunk appendages | (?) ambiguous            | <b>(0) undifferentiated, or reduced in size only</b>                   | (?) ambiguous           | Taphonomic analysis indicates lack of jaws is real, not result of decay    |
| 15. Nature of second post-ocular (tritocerebral) appendage                            | (1) specialized papillae | <b>(0) undifferentiated lobopodous limb</b>                            | <b>(?) ambiguous</b>    | <i>Helenedora</i> lacks slime papillae                                     |
| 24. One or more pairs of appendages located anteriorly relative to the mouth opening  | (1) present              | <b>(?) ambiguous</b>                                                   | <b>(?) ambiguous</b>    | <i>Helenedora</i> does not preserve a mouth, so this position is ambiguous |
| 36. Annulations                                                                       | (?) ambiguous            | <b>(1) present</b>                                                     | <b>(1) present</b>      | Present in new material                                                    |
| 38. Organization of trunk annulation                                                  | (?) ambiguous            | <b>(0) homonomous</b>                                                  | <b>(0) homonomous</b>   | Present in new material                                                    |
| 46. Sclerites consist of a stack of constituent elements                              | (?) ambiguous            | <b>(-) inapplicable: terminal claws on limbs (Character 64) absent</b> | (?) ambiguous           | Taphonomic analysis indicates lack of claws is real, not result of decay   |
| 52. Serially repeated mid-gut glands                                                  | (0) absent               | <b>(?) ambiguous</b>                                                   | <b>(?) ambiguous</b>    | No internal anatomy is preserved                                           |
| 62. Papillae on lobopodous limbs                                                      | (1) present              | <b>(?) ambiguous</b>                                                   | <b>(?) ambiguous</b>    | Features describe as papillae are treated here as equivocal                |
| 64. Terminal claws on trunk limbs                                                     | (1) present              | <b>(0) absent</b>                                                      | <b>(?) ambiguous</b>    | Taphonomic analysis indicates lack of claws is real, not result of decay   |
| 65. Terminal claws with multiple branches                                             | (0) absent               | <b>(-) inapplicable: terminal claws (Character 64) absent</b>          | <b>(?) ambiguous</b>    | Taphonomic analysis indicates lack of claws is real, not result of decay   |
| 66. Number of claws on trunk limbs (0)                                                | (1) two                  | <b>(-) inapplicable: terminal claws (Character 64) absent</b>          | <b>(?) ambiguous</b>    | Taphonomic analysis indicates lack of claws is real, not result of decay   |
| 67. Differentiated distal foot in lobopodous trunk limbs                              | (?) ambiguous            | <b>(0) absent</b>                                                      | <b>(0) absent</b>       | Limb morphology clear in new material                                      |
| 75. Limbless posterior extension of the lobopodous trunk beyond last appendage pair   | (?) ambiguous            | <b>(1) present</b>                                                     | <b>(1) present</b>      | Posterior morphology clear in new material                                 |
| 80. Claws on posterior appendages directed anteriad                                   | (?) ambiguous            | <b>(-) inapplicable: terminal claws (Character 64) absent</b>          | (?) ambiguous           | Taphonomic analysis indicates lack of claws is real, not result of decay   |
